# Supplementary material for: A Fatal Rhizopus Species Infection after Facial Injury in a Patient with Myelodysplastic Syndrome and Diabetes Mellitus
Source: PubMed Central journal article supplement — Intern Med. 2023 Aug 1;62(15):2279–83. doi: 10.2169/internalmedicine.0741-22 (PMC10465287; doi:10.2169/internalmedicine.0741-22), 2023-08-01
Supplement: 1349-7235-62-2279-s001.pdf [file 1349-7235-62-2279-s001.pdf]

1 **Supplementary Table 1: Results of amplification of fungal DNA by PCR combined with**

2 **DNA sequencing**

3 ITS1: 5'-TCC GTA GGT GAA CCT GCG G-3'

4 ITS2: 5'-GCT GCG TTC TTC ATC GAT GC-3'

5 ITS3: 5'-GCA TCG ATG AAG AAC GCA GC-3'

6 ITS4: 5'-TCC TCC GCT TAT TGA TAT GC-3'

7 NL1: 5'-GCA TAT CAA TAA GCG GAG GAA AA-3'

8 NL4: 5'-GGT CCG TGT TTC AAG ACG G-3'

9 ZM1: 5'-ATT ACC ATG AGC AAA TCA GA-3'

10 ZM2: 5'-TCC GTC AAT TCC TTT AAG TTT C-3'

11 ZM3: 5'-CAA TCC AAG AAT TTC ACC TCT AG-3'

12

13 ZM1 to ZM3 are Mucorales-specific primers. DNA sequencing was performed by PCR using

14 the above primers, but only the ZM1-ZM3 region could be sequenced. The sequence was as

15 follows (116 bp):

16 TATCATTACTATAGTACCTAAACCAACGAAAATAGGACTAAAGTCATATATTTTCATTA

17 TTCCATGCTAACACACATTCAAGCTTAAAGCCTGCTTTAAACACTCTGATTTGCTC

18 ATGGT

19 The above sequence was checked against GenBank and found to be a 100% match with the

20 genus *Rhizopus*, but since several species were lined up in the same row with a 100% match,

21 we could only identify the genus (*Rhizopus*) and not the species.

22

23 DNA, deoxyribonucleic acid; PCR, polymerase chain reaction

24
